# Supplementary material
Source: PubMed Central journal article supplement (PMC4498148)

# Supplementary Figure 1

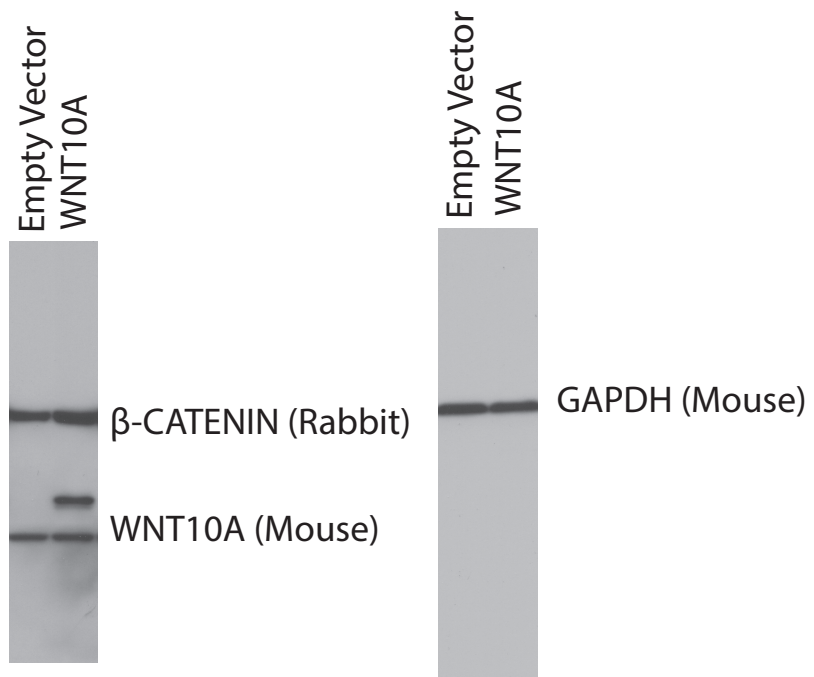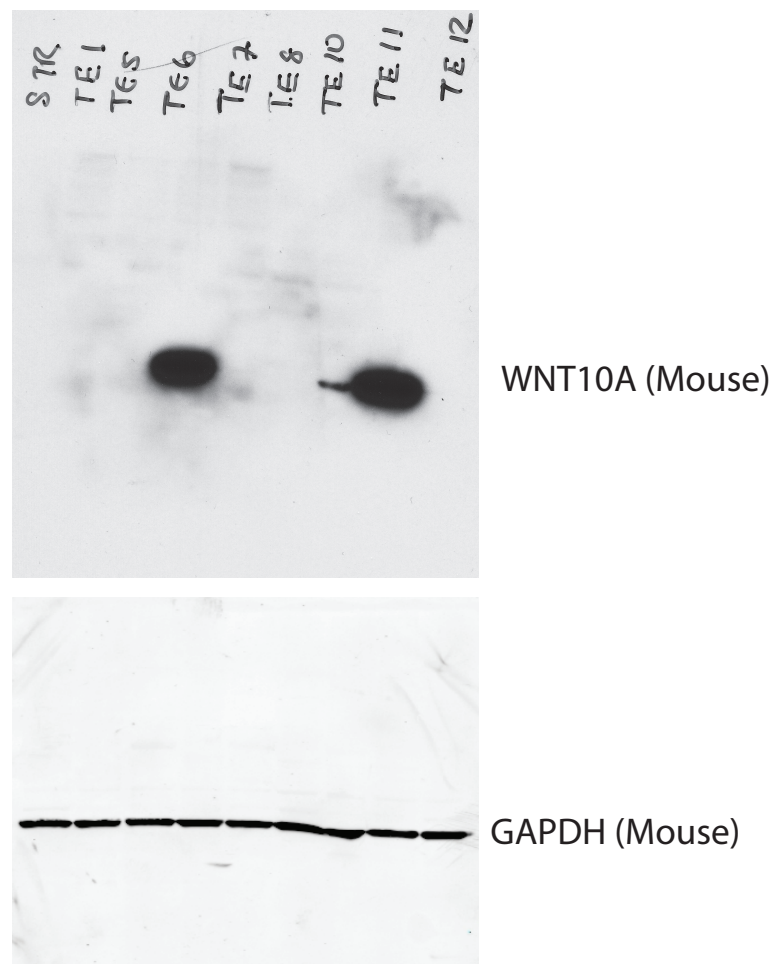

Supplement: supp_bgv025_Supplementary_Figure_1.pdf [file supp_bgv025_Supplementary_Figure_1.pdf]
